# Supplementary material
Source: publisher site journal article supplement (https://www.dovepress.com/get_supplementary_file.php?f=187973.xlsx)
Supplement: Supplementary file 1 [file get_supplementary_file.php]

## Sheet: Sheet1
Supplementary Table S3 The primer used for multiplex miRNA array
miRNAs	Primers(5'-3')
let-7a	tgaggtagtaggttgtatagtt
let-7b	tgaggtagtaggttgtgtggtt
let-7c	tgaggtagtaggttgtatggtt
let-7d	agaggtagtaggttgcatagtt
let-7e	tgaggtaggaggttgtatagtt
let-7f	tgaggtagtagattgtatagtt
let-7g	tgaggtagtagtttgtacagtt
let-7i	tgaggtagtagtttgtgctgtt
miR-1	tggaatgtaaagaagtatgtat
miR-100	aacccgtagatccgaacttgtg
miR-101	tacagtactgtgataactgaa
miR-103a	agcagcattgtacagggctatga
miR-105	tcaaatgctcagactcctgtggt
miR-106a	aaaagtgcttacagtgcaggtag
miR-106b	taaagtgctgacagtgcagat
miR-107	agcagcattgtacagggctatca
miR-10a	taccctgtagatccgaatttgtg
miR-10b	taccctgtagaaccgaatttgtg
miR-122	tggagtgtgacaatggtgtttg
miR-124	taaggcacgcggtgaatgcc
miR-125a	tccctgagaccctttaacctgtga
miR-125a-3p	acaggtgaggttcttgggagcc
miR-125b	tccctgagaccctaacttgtga
miR-126	tcgtaccgtgagtaataatgcg
miR-127	tcggatccgtctgagcttggct
miR-128	tcacagtgaaccggtctcttt
miR-129	ctttttgcggtctgggcttgc
miR-130a	cagtgcaatgttaaaagggcat
miR-130b	cagtgcaatgatgaaagggcat
miR-132	taacagtctacagccatggtcg
miR-133a	tttggtccccttcaaccagctg
miR-133b	tttggtccccttcaaccagcta
miR-134	tgtgactggttgaccagagggg
miR-135a	tatggctttttattcctatgtga
miR-135b	tatggcttttcattcctatgtga
miR-136	actccatttgttttgatgatgga
miR-138	agctggtgttgtgaatcaggccg
miR-139	tctacagtgcacgtgtctccagt
miR-140	cagtggttttaccctatggtag
miR-140-3p	taccacagggtagaaccacgg
miR-141	tcggatccgtctgagcttggct
miR-142-3p	tgtagtgtttcctactttatgga
miR-142-5p	cataaagtagaaagcactact
miR-143	tgagatgaagcactgtagctc
miR-144	tacagtatagatgatgtact
miR-145	gtccagttttcccaggaatccct
miR-146a	tgagaactgaattccatgggtt
miR-146b	tgagaactgaattccataggct
miR-148a	tcagtgcactacagaactttgt
miR-148b	tcagtgcatcacagaactttgt
miR-149	tctggctccgtgtcttcactccc
miR-150	tctcccaacccttgtaccagtg
miR-151a	ctagactgaagctccttgagg
miR-152	tcagtgcatgacagaacttgg
miR-153	ttgcatagtcacaaaagtgatc
miR-155	ttaatgctaatcgtgataggggt
miR-15a	tagcagcacataatggtttgtg
miR-15b	tagcagcacatcatggtttaca
miR-16	tagcagcacgtaaatattggcg
miR-17	caaagtgcttacagtgcaggtag
miR-17-3p	actgcagtgaaggcacttgtag
miR-181a	aacattcaacgctgtcggtgagt
miR-181b	aacattcattgctgtcggtgggt
miR-181c	aacattcaacctgtcggtgagt
miR-181d	aacattcattgttgtcggtgggt
miR-182	tttggcaatggtagaactcacact
miR-183	tatggcactggtagaattcact
miR-184	tggacggagaactgataagggt
miR-185	tggagagaaaggcagttcctga
miR-186	caaagaattctccttttgggct
miR-18a	taaggtgcatctagtgcagatag
miR-18b	taaggtgcatctagtgcagttag
miR-191	caacggaatcccaaaagcagctg
miR-192	ctgacctatgaattgacagcc
miR-193a	aactggcctacaaagtcccagt
miR-193a-5p	tgggtctttgcgggcgagatga
miR-193b	aactggccctcaaagtcccgct
miR-194	tgtaacagcaactccatgtgga
miR-195	tagcagcacagaaatattggc
miR-196a	taggtagtttcatgttgttggg
miR-196b	taggtagtttcctgttgttggg
miR-197	ttcaccaccttctccacccagc
miR-199a	cccagtgttcagactacctgttc
miR-199a-3p	acagtagtctgcacattggtta
miR-199b	cccagtgtttagactatctgttc
miR-19a	tgtgcaaatctatgcaaaactga
miR-19b	tgtgcaaatccatgcaaaactga
miR-200a	taacactgtctggtaacgatgt
miR-200b	taatactgcctggtaatgatga
miR-200c	taatactgccgggtaatgatgga
miR-203	gtgaaatgtttaggaccactag
miR-204	ttccctttgtcatcctatgcct
miR-205	tccttcattccaccggagtctg
miR-206	tggaatgtaaggaagtgtgtgg
miR-20a	taaagtgcttatagtgcaggtag
miR-20b	caaagtgctcatagtgcaggtag
miR-21	tagcttatcagactgatgttga
miR-210	ctgtgcgtgtgacagcggctga
miR-211	ttccctttgtcatccttcgcct
miR-212	taacagtctccagtcacggcc
miR-214	acagcaggcacagacaggcagt
miR-215	atgacctatgaattgacagac
miR-218	ttgtgcttgatctaaccatgt
miR-22	aagctgccagttgaagaactgt
miR-221	agctacattgtctgctgggtttc
miR-222	agctacatctggctactgggt
miR-223	tgtcagtttgtcaaatacccca
miR-224	caagtcactagtggttccgtt
miR-23a	atcacattgccagggatttcc
miR-23b	atcacattgccagggattacc
miR-24	tggctcagttcagcaggaacag
miR-25	cattgcacttgtctcggtctga
miR-26a	ttcaagtaatccaggataggct
miR-26b	ttcaagtaattcaggataggt
miR-27a	ttcacagtggctaagttccgc
miR-27b	ttcacagtggctaagttctgc
miR-28	aaggagctcacagtctattgag
miR-296	agggccccccctcaatcctgt
miR-29a	tagcaccatctgaaatcggtta
miR-29b	tagcaccatttgaaatcagtgtt
miR-29c	tagcaccatttgaaatcggtta
miR-302a	taagtgcttccatgttttggtga
miR-302b	taagtgcttccatgttttagtag
miR-302c	taagtgcttccatgtttcagtgg
miR-302d	taagtgcttccatgtttgagtgt
miR-30a	tgtaaacatcctcgactggaag
miR-30b	tgtaaacatcctacactcagct
miR-30c	tgtaaacatcctacactctcagc
miR-30d	tgtaaacatccccgactggaag
miR-30e	tgtaaacatccttgactggaag
miR-31	aggcaagatgctggcatagct
miR-32	tattgcacattactaagttgca
miR-320a	aaaagctgggttgagagggcga
miR-323	cacattacacggtcgacctct
miR-324-5p	cgcatcccctagggcattggtgt
miR-329	aacacacctggttaacctcttt
miR-33	gtgcattgtagttgcattgca
miR-330	gcaaagcacacggcctgcagaga
miR-331	gcccctgggcctatcctagaa
miR-335	tcaagagcaataacgaaaaatgt
miR-337	ctcctatatgatgcctttcttc
miR-338	tccagcatcagtgattttgttg
miR-339	tccctgtcctccaggagctcacg
miR-342	tctcacacagaaatcgcacccgt
miR-345	gctgactcctagtccagggctc
miR-34a	tggcagtgtcttagctggttgt
miR-34b	taggcagtgtcattagctgattg
miR-34c	aggcagtgtagttagctgattgc
miR-365	taatgcccctaaaaatccttat
miR-375	tttgttcgttcggctcgcgtga
miR-376a	atcatagaggaaaatccacgt
miR-378	actggacttggagtcagaaggc
miR-382	gaagttgttcgtggtggattcg
miR-383	agatcagaaggtgattgtggct
miR-423	agctcggtctgaggcccctcagt
miR-423-5p	tgaggggcagagagcgagacttt
miR-424	cagcagcaattcatgttttgaa
miR-425	aatgacacgatcactcccgttga
miR-429	taatactgtctggtaaaaccgt
miR-432	tcttggagtaggtcattgggtgg
miR-451a	aaaccgttaccattactgagtt
miR-452	aactgtttgcagaggaaactga
miR-455	tatgtgcctttggactacatcg
miR-455-3p	gcagtccatgggcatatacac
miR-483	tcactcctctcctcccgtctt
miR-483-5p	aagacgggaggaaagaagggag
miR-486	tcctgtactgagctgccccgag
miR-494	tgaaacatacacgggaaacctc
miR-495	aaacaaacatggtgcacttctt
miR-497	cagcagcacactgtggtttgt
miR-503	tagcagcgggaacagttctgcag
miR-532	catgccttgagtgtaggaccgt
miR-584	ttatggtttgcctgggactgag
miR-652	aatggcgccactagggttgtg
miR-7	tggaagactagtgattttgttgt
miR-708	aaggagcttacaatctagctggg
miR-9	tctttggttatctagctgtatga
miR-92a	tattgcacttgtcccggcctgt
miR-92b	tattgcactcgtcccggcctcc
miR-93	caaagtgctgttcgtgcaggtag
miR-96	tttggcactagcacatttttgct
miR-98	tgaggtagtaagttgtattgtt
miR-99a	aacccgtagatccgatcttgtg
miR-99b	cacccgtagaaccgaccttgcg
